# Supplementary material for: Ants of French Guiana: 16S rRNA sequence dataset
Source: Biodivers Data J. 2023 Feb 7;11:e91577. doi: 10.3897/BDJ.11.e91577 (PMC10848834; doi:10.3897/BDJ.11.e91577)
Supplement: Supplementary material 4 — Intraspecific variations in sequences [file bdj-11-e91577-s004.xlsx]

## Sheet: Intraspecific variation
Species	Number of sequences	Mean (±SD) percentage of intraspecific variation
Acanthognathus_brevicornis	7	0.67 (±0.68)
Acanthognathus_ocellatus	4	8.1 (±4.95)
Acropyga_fuhrmanni	4	7.33 (±7.51)
Anochetus_inermis	6	1.49 (±1.28)
Anochetus_mayri	9	0.19 (±0.25)
Anochetus_targionii	13	1.74 (±2.17)
Apterostigma_auriculatum	5	2.56 (±3.51)
Apterostigma_robustum	3	2.53 (±2.83)
Apterostigma_urichii	6	1.54 (±1.65)
Atta_cephalotes	5	0.22 (±0.22)
Azteca_sp.SL13.01	4	9.69 (±7.2)
Camponotus_atriceps	5	0.45 (±0.47)
Camponotus_blandus	5	0 (±0.0)
Camponotus_coruscus	3	0 (±0.0)
Camponotus_fastigatus	9	12.67 (±9.83)
Camponotus_novogranadensis	4	7.5 (±9.68)
Camponotus_senex	9	2.63 (±2.45)
Cephalotes_minutus	3	0 (±0.0)
Dolichoderus_imitator	24	3.64 (±3.36)
Eciton_vagans	3	5.84 (±5.84)
Ectatomma_lugens	6	0 (±0.0)
Gigantiops_destructor	3	0 (±0.0)
Gnamptogenys_acuminata	6	0 (±0.0)
Gnamptogenys_horni	24	5.68 (±7.04)
Gnamptogenys_tortuolosa	11	1.9 (±2.05)
Hylomyrma_immanis	18	3.98 (±5.63)
Hypoponera_sp.02.FGSGt	27	9.57 (±5.43)
Leptogenys_gaigei	3	0 (±0.0)
Linepithema_neotropicum	5	0.47 (±0.68)
Mayaponera_constricta	25	0.71 (±0.74)
Megalomyrmex_drifti	5	8.92 (±6.94)
Megalomyrmex_sp.SL13.01	7	2.39 (±2.44)
Mycetomoellerius_sp.A	3	0 (±0.0)
Mycetomoellerius_sp.B	4	7.05 (±8.0)
Myrmicocrypta_sp.07.FGSGt	8	9.13 (±7.18)
Myrmicocrypta_sp.MI15.03	3	3.05 (±3.05)
Myrmicocrypta_sp.TR17.01	17	6.97 (±6.2)
Neivamyrmex_diana	3	0 (±0.0)
Neocerapachys_splendens	3	1.26 (±1.41)
Neoponera_apicalis	5	0.23 (±0.24)
Neoponera_verenae	5	0 (±0.0)
Nylanderia_fulva	8	6.47 (±4.42)
Ochetomyrmex_semipolitus	5	4.12 (±5.12)
Octostruma_iheringi	8	4.76 (±4.15)
Odontomachus_laticeps	12	0.44 (±0.51)
Pachycondyla_crassinoda	5	0.86 (±0.96)
Pheidole_astur	11	0.08 (±0.17)
Pheidole_embolopyx	17	6.74 (±7.83)
Pheidole_fallax	4	0 (±0.0)
Pheidole_fissiceps	20	0.49 (±0.71)
Pheidole_flavens	77	13.89 (±7.51)
Pheidole_gp.fallax.sp.F	7	0.11 (±0.19)
Pheidole_gp.tristis.sp.D	4	0 (±0.0)
Pheidole_lattkei	8	0.43 (±0.46)
Pheidole_lovejoyi	19	8.22 (±8.44)
Pheidole_microps	5	12.18 (±9.29)
Pheidole_mutisi	3	0 (±0.0)
Pheidole_nr.fimbriata.sp.D	10	0.65 (±0.95)
Pheidole_nr.subarmata	5	0.22 (±0.22)
Pheidole_vorax	19	2.07 (±6.07)
Platythyrea_pilosula	3	0.45 (±0.5)
Pseudomyrmex_tenuis	5	8.59 (±12.2)
Pseudoponera_stigma	8	3.22 (±5.63)
Rogeria_lirata	5	0 (±0.0)
Rogeria_subarmata	3	7.58 (±7.58)
Sericomyrmex_parvulus	7	0.96 (±1.15)
Solenopsis_altinodis	6	0 (±0.0)
Solenopsis_globularia	3	10 (±10.0)
Solenopsis_sp.15	315	10.58 (±7.2)
Solenopsis_sp.SAV18.01	3	0 (±0.0)
Solenopsis_sp.SAV18.02	3	0 (±0.0)
Solenopsis_virulens	11	3.45 (±3.68)
Strumigenys_cordovensis	3	0 (±0.0)
Strumigenys_perparva	8	9.77 (±6.21)
Strumigenys_smithii	5	0.29 (±0.29)
Strumigenys_subedentata	32	3.73 (±4.21)
Strumigenys_trinidadensis	4	1.31 (±1.35)
Wasmannia_scrobifera	4	4.86 (±6.3)
Acromyrmex_subterraneus	4	1.62 (±2.09)
Acropyga_decedens	3	12.48 (±13.96)
Acropyga_guianensis	4	8.44 (±6.94)
Anochetus_horridus	9	2.42 (±2.5)
Apterostigma_acre	8	7.17 (±5.28)
Apterostigma_pilosum	55	10.31 (±7.67)
Brachymyrmex_pictus	4	15.61 (±9.5)
Camponotus_coloratus	5	6.38 (±8.44)
Camponotus_rapax	5	1.01 (±1.48)
Camponotus_simillimus	3	0 (±0.0)
Camponotus_sp.04.FGSGt	3	10.93 (±8.37)
Carebara_reina	16	2.55 (±6.83)
Carebara_sp.KW14.01	13	10.75 (±7.89)
Carebara_urichi	35	12.73 (±10.22)
Crematogaster_abstinens	7	9.94 (±8.65)
Crematogaster_brasiliensis	14	5.86 (±5.59)
Crematogaster_carinata	3	6.32 (±7.07)
Crematogaster_flavomicrops	3	0.24 (±0.24)
Crematogaster_flavosensitiva	50	8.62 (±7.31)
Crematogaster_levior	83	1.89 (±1.84)
Crematogaster_limata	24	3.68 (±4.71)
Crematogaster_sotobosque	18	0.46 (±0.45)
Cyphomyrmex_peltatus	18	9.09 (±10.72)
Cyphomyrmex_rimosus	43	14.15 (±6.34)
Discothyrea_denticulata	5	3.05 (±2.79)
Dolichoderus_bispinosus	7	0.12 (±0.21)
Ectatomma_edentatum	16	3.11 (±5.88)
Ectatomma_tuberculatum	5	3.35 (±2.8)
Holcoponera_relicta	16	6.97 (±9.19)
Holcoponera_striatula	6	2.29 (±1.61)
Hylomyrma_blandiens	19	3.74 (±2.94)
Hylomyrma_reginae	11	0.69 (±0.98)
Hypoponera_foreli	25	3.78 (±2.88)
Hypoponera_sp.12.FGSGt	17	16.67 (±13.26)
Hypoponera_sp.13.FGSGt	81	4.61 (±4.71)
Hypoponera_sp.B	29	9.41 (±11.66)
Hypoponera_sp.IT14.01	35	3.2 (±5.16)
Hypoponera_sp.IT14.02	37	1.59 (±6.3)
Hypoponera_sp.IT14.05	49	13.74 (±8.61)
Hypoponera_sp.MI15.02	5	16.33 (±12.65)
Hypoponera_sp.MI15.03	8	11.84 (±8.81)
Hypoponera_sp.MI15.05	4	0.19 (±0.24)
Labidus_praedator	5	0 (±0.0)
Mayaponera_arhuaca	3	0 (±0.0)
Megalomyrmex_incisus	9	7.09 (±7.11)
Megalomyrmex_sp.CSG15.01	7	9.23 (±11.01)
Megalomyrmex_sp.IT14.01	12	10.74 (±10.83)
Mycetomoellerius_farinosus	5	6.7 (±6.97)
Mycetomoellerius_sp.CSG15.01	3	0 (±0.0)
Myrmicocrypta_sp.MI15.05	7	6.44 (±11.31)
Nylanderia_guatemalensis	14	10.48 (±7.25)
Nylanderia_sp.IT14.01	4	1.62 (±1.62)
Nylanderia_sp.SL13.04	3	9.25 (±6.95)
Nylanderia_steinheili	8	5.62 (±4.63)
Ochetomyrmex_neopolitus	47	8.56 (±7.02)
Octostruma_balzani	30	3.9 (±3.04)
Octostruma_betschi	36	3.58 (±5.71)
Odontomachus_haematodus	21	1.72 (±2.89)
Odontomachus_meinerti	8	1.55 (±1.67)
Odontomachus_scalptus	19	0.6 (±0.84)
Pachycondyla_harpax	39	7.02 (±4.79)
Paratrachymyrmex_cornetzi	21	21.07 (±11.99)
Paratrachymyrmex_mandibularis	15	5.12 (±9.18)
Pheidole_aripoensis	27	0.28 (±0.55)
Pheidole_biconstricta	34	2.41 (±2.2)
Pheidole_cataractae	61	1.29 (±2.76)
Pheidole_cramptoni	3	3.5 (±3.51)
Pheidole_cursor	14	0.98 (±0.89)
Pheidole_deima	11	5.77 (±5.62)
Pheidole_demeter	3	10.05 (±10.05)
Pheidole_dorsata	6	5.37 (±6.01)
Pheidole_exigua	3	13.19 (±13.19)
Pheidole_gp.fallax.sp.D	10	0.37 (±0.43)
Pheidole_gp.tristis.sp.C	19	1.14 (±1.03)
Pheidole_gp.tristis.sp.H1	3	0 (±0.0)
Pheidole_guajirana	26	3.23 (±4.82)
Pheidole_jeannei	8	5.26 (±5.62)
Pheidole_jelskii	11	0.23 (±0.51)
Pheidole_longiseta	16	16.4 (±8.29)
Pheidole_mamore	23	4.37 (±4.25)
Pheidole_meinertopsis	101	10.04 (±10.14)
Pheidole_midas	40	1.22 (±2.28)
Pheidole_neoschultzi	38	0.89 (±1.14)
Pheidole_nitella	87	2.56 (±2.45)
Pheidole_nr.araneoides	5	0 (±0.0)
Pheidole_nr.cramptoni	5	0.3 (±0.43)
Pheidole_nr.radoszkowskii	5	0 (±0.0)
Pheidole_nr.sagax	5	7 (±7.21)
Pheidole_nr.seeldrayersii	4	11.29 (±10.25)
Pheidole_pedana	58	3.68 (±5.83)
Pheidole_pholeops	4	15.54 (±9.65)
Pheidole_radoszkowskii	3	0 (±0.0)
Pheidole_rugatula	3	0 (±0.0)
Pheidole_sagax	19	4.26 (±3.66)
Pheidole_scolioceps	18	0 (±0.0)
Pheidole_sculptior	4	1.62 (±1.62)
Pheidole_sp.KR17.02	4	0 (±0.0)
Pheidole_sp.MI15.01	3	0.23 (±0.23)
Pheidole_zelata	3	0 (±0.0)
Prionopelta_amabilis	12	3.56 (±8.38)
Prionopelta_dubia	14	9.47 (±8.6)
Rogeria_blanda	3	4.02 (±4.02)
Rogeria_scobinata	8	7.54 (±4.37)
Sericomyrmex_bondari	17	2.2 (±1.87)
Sericomyrmex_mayri	55	0.12 (±0.29)
Sericomyrmex_saussurei	8	1.38 (±1.31)
Solenopsis_bicolor	17	6.41 (±9.65)
Solenopsis_saevissima	5	0.92 (±0.95)
Solenopsis_sp.02	8	3.27 (±4.22)
Solenopsis_sp.03	32	6.84 (±6.59)
Solenopsis_sp.11	91	2.87 (±4.67)
Solenopsis_sp.12	3	10.73 (±12.0)
Solenopsis_sp.13	53	1.54 (±2.63)
Solenopsis_sp.21	4	13.84 (±10.74)
Solenopsis_sp.23	3	10.97 (±10.98)
Solenopsis_sp.24	116	9.82 (±8.59)
Solenopsis_sp.28	12	4.5 (±3.33)
Strumigenys_alberti	3	0 (±0.0)
Strumigenys_auctidens	22	3.19 (±2.41)
Strumigenys_crassicornis	7	7.51 (±9.13)
Strumigenys_denticulata	99	10.79 (±8.82)
Strumigenys_diabola	3	0 (±0.0)
Strumigenys_elongata	21	7.19 (±5.82)
Wasmannia_auropunctata	38	2.42 (±3.95)
